# Supplementary material for: Impact of febuxostat on visit-to-visit blood pressure variability: insights from the randomised PRIZE Study
Source: HighWire-hosted journal article supplement (doi:10.1136/rmdopen-2022-002505), 2022-09-01
Supplement: rmdopen-2022-002505supp001_data_supplement.pdf [file rmdopen-2022-002505supp001_data_supplement.pdf]

**Table S1. Antihypertensive medications at each timepoint**

| Variable                | Febuxostat group<br>(n=236) | Control group<br>(n=236) |
|-------------------------|-----------------------------|--------------------------|
| At 6 months             |                             |                          |
| ACE-I                   | 23 (9.9%)                   | 25 (10.8%)               |
| ARB                     | 130 (56.0%)                 | 142 (61.2%)              |
| Calcium channel blocker | 134 (57.8%)                 | 120 (51.7%)              |
| $\beta$ -blocker        | 87 (37.5%)                  | 93 (40.1%)               |
| Diuretic                | 67 (28.9%)                  | 64 (27.6%)               |
| At 12 months            |                             |                          |
| ACE-I                   | 20 (8.9%)                   | 23 (10.4%)               |
| ARB                     | 128 (57.1%)                 | 134 (60.6%)              |
| Calcium channel blocker | 132 (58.9%)                 | 115 (52.0%)              |
| $\beta$ -blocker        | 88 (39.3%)                  | 90 (40.7%)               |
| Diuretic                | 62 (27.7%)                  | 58 (26.2%)               |
| At 24 months            |                             |                          |
| ACE-I                   | 17 (7.8%)                   | 18 (8.7%)                |
| ARB                     | 119 (54.6%)                 | 128 (62.1%)              |
| Calcium channel blocker | 119 (54.6%)                 | 112 (54.4%)              |
| $\beta$ -blocker        | 84 (38.5%)                  | 85 (41.3%)               |
| Diuretic                | 58 (26.6%)                  | 57 (27.7%)               |

ACE-I, angiotensin converting enzyme inhibitor; ARB, angiotensin II receptor blocker.

**Table S2. Baseline characteristics for BP and PR variability assessment**

| Variable                             | All<br>(n=420)    | Febuxostat group<br>(n=214) | Control group<br>(n=206) | SMD   |
|--------------------------------------|-------------------|-----------------------------|--------------------------|-------|
| Age (years)                          | 70.0 [63.0, 77.0] | 70.0 [63.0, 76.0]           | 70.0 [62.0, 77.0]        | 0.057 |
| Male                                 | 340 (81.0%)       | 171 (79.9%)                 | 169 (82.0%)              | 0.054 |
| Body mass index (kg/m <sup>2</sup> ) | 24.6 [22.5, 27.1] | 24.4 [22.3, 26.8]           | 24.9 [22.9, 27.4]        | 0.045 |
| Hypertension                         | 374 (89.0%)       | 190 (88.8%)                 | 184 (89.4%)              | 0.017 |
| Diabetes                             | 160 (38.1%)       | 81 (37.9%)                  | 79 (38.3%)               | 0.010 |
| Dyslipidemia                         | 253 (60.2%)       | 131 (61.2%)                 | 122 (59.2%)              | 0.041 |
| Current smoking                      | 42 (10.0%)        | 23 (10.7%)                  | 19 (9.2%)                | 0.051 |
| Prior myocardial infarction          | 52 (12.4%)        | 29 (13.6%)                  | 23 (11.2%)               | 0.073 |
| Prior stroke                         | 24 (5.7%)         | 14 (6.5%)                   | 10 (4.9%)                | 0.073 |
| Prior heart failure                  | 69 (16.4%)        | 38 (17.8%)                  | 31 (15.0%)               | 0.073 |
| eGFR (mL/min/1.73 m <sup>2</sup> )   | 55.0 [45.5, 66.7] | 55.0 [44.8, 65.9]           | 55.1 [46.3, 66.9]        | 0.078 |
| Serum uric acid (mg/dL)              | 7.6 [7.1, 8.2]    | 7.6 [7.2, 8.2]              | 7.6 [7.1, 8.3]           | 0.039 |
| Medications at baseline              |                   |                             |                          |       |
| ACE-I                                | 43 (10.2%)        | 22 (10.3%)                  | 21 (10.2%)               | 0.003 |
| ARB                                  | 241 (57.4%)       | 120 (56.1%)                 | 121 (58.7%)              | 0.054 |
| Calcium channel blocker              | 223 (53.1%)       | 118 (55.1%)                 | 105 (51.0%)              | 0.084 |
| β-blocker                            | 166 (39.5%)       | 81 (37.9%)                  | 85 (41.3%)               | 0.070 |
| Diuretic                             | 122 (29.0%)       | 63 (29.4%)                  | 59 (28.6%)               | 0.018 |
| Statin                               | 207 (49.3%)       | 104 (48.6%)                 | 103 (50.0%)              | 0.028 |

Values are expressed as median [interquartile range] or number (%). A total of 420 of 472 patients had systolic BP measurement  $\geq 3$  times during the study period and were included into the BP and PR variability assessment. ACE-I, angiotensin converting enzyme inhibitor; ARB, angiotensin II receptor blocker; BP, blood pressure; eGFR, estimated glomerular filtration rate; PR, pulse rate; SMD, standardized mean difference.

**Figure S1. Association of mean systolic BP and SD and CV of systolic BP with serum uric acid levels at 24 months**

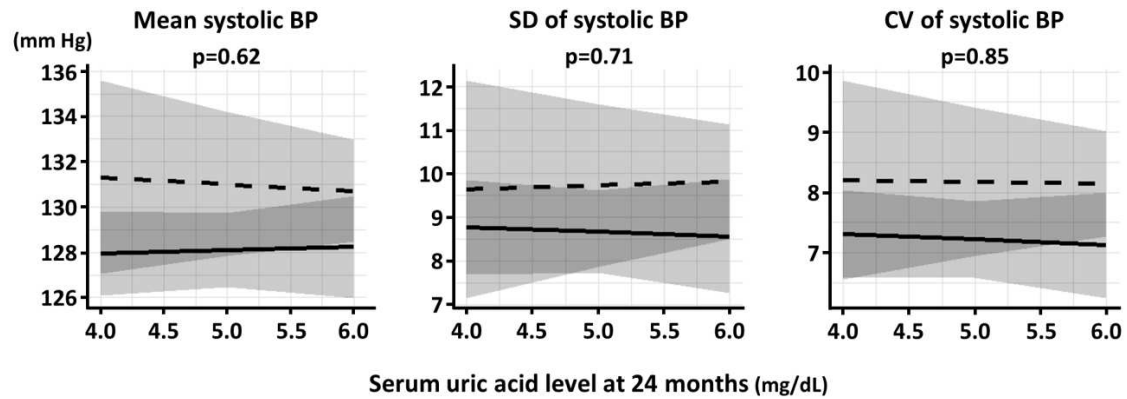

Solid and dash lines indicate the febxostat and control groups. Mean systolic BP and SD and CV of systolic BP are adjusted by age, sex, and baseline systolic BP, and are expressed with 95% confidence intervals.

BP, blood pressure; CV, coefficient of variation; SD, standard deviation.
